# Supplementary material for: Engineering Cell Polarization Improves Protein Production in Saccharomyces cerevisiae
Source: MDPI journal article supplement (doi:10.3390/microorganisms10102005), 2022-10-11
Supplement: s1 [file s1]

## Supporting information

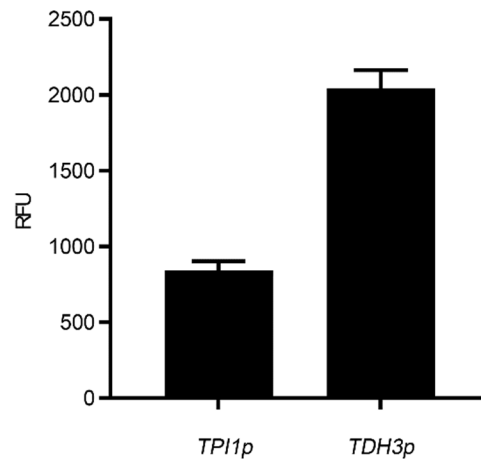

**Figure S1.** Expression of eGFP driven by *TPI1p* and *TDH3p*. The eGFP was expressed in Lab001 by centromeric plasmid driven by *TPI1p* and *TDH3p*. All strains were cultivated in the YPD medium at 30 °C for 24 h. Data are mean  $\pm$  SD from three independent experiments. RFU: relative fluorescence units, fluorescence intensity per unit of OD<sub>600</sub>.

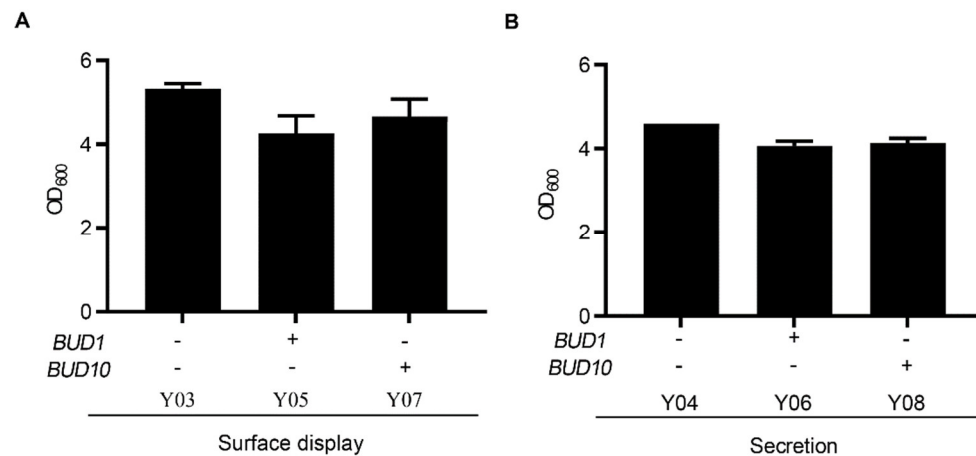

**Figure S2.** Cell growth of surface-displaying (A) and secreting (B) strains with the genomic expression of *BUD1* or *BUD10*. All strains were cultivated in the YPD medium at 30 °C for 24 h. Data are mean  $\pm$  SD from three independent experiments.

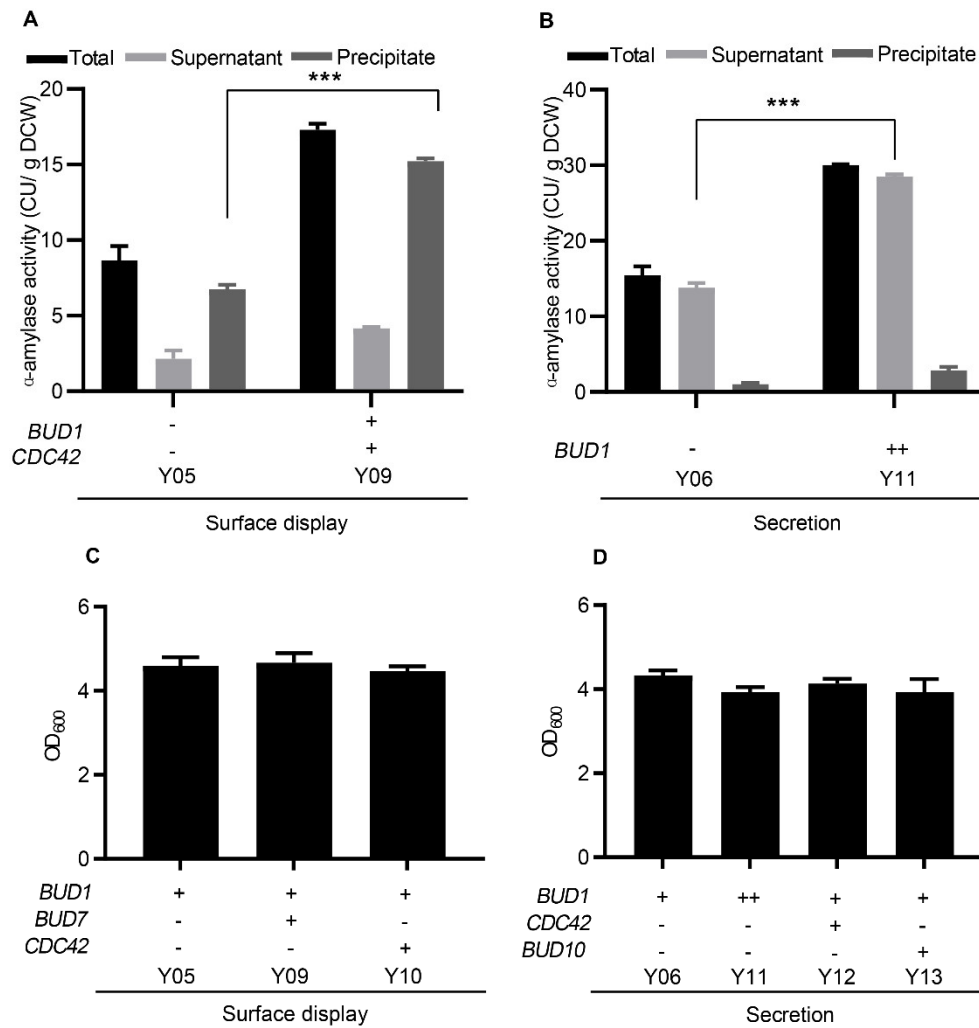

**Figure S3.** The effect of combinatorial modifications on the production of  $\alpha$ -amylase and cell growth. (A) Combinatorial modifications increased the surface display of  $\alpha$ -amylase. (B) Combinatorial modifications increased the secretion of  $\alpha$ -amylase. The cell growth of combinatorial modifications in surface-displaying (C) and secreting (D) strains. All strains were cultivated in the YPD medium at 30 °C for 24 h. Data are mean  $\pm$  SD from three independent experiments. The statistical significance of enzymatic assays was determined by a two-tailed homoscedastic (equal variance) t-test and three asterisks represents  $P < 0.005$ .

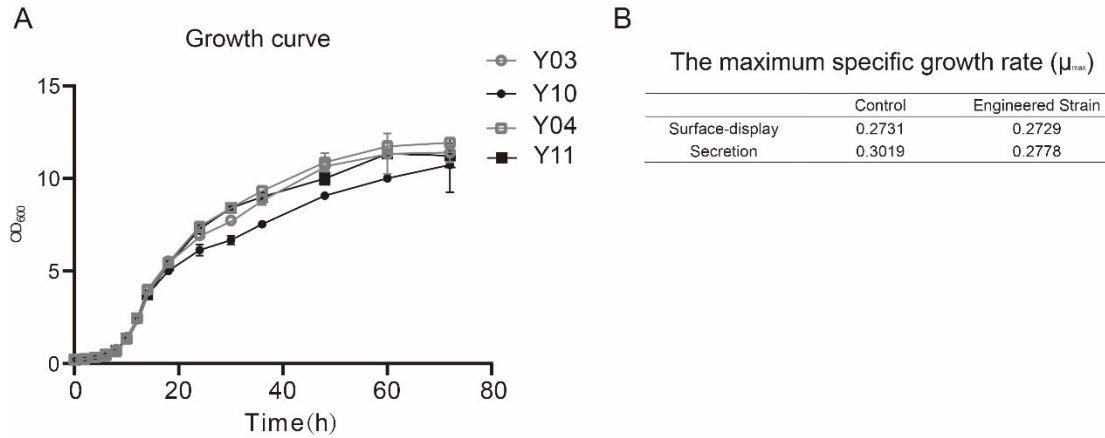

**Figure S4.** The growth curve (A) and the maximum specific growth rate of engineered strains. All strains were cultivated in the YPD medium at 30 °C for 72 h. Data are mean  $\pm$  SD from three independent experiments.

**Table S1.** Strains used in this study

| Strains | Relevant characteristics/ genotype                                           | Reference  |
|---------|------------------------------------------------------------------------------|------------|
| Lab001  | MATa ura3-52 can1 $\Delta$ ::cas9-natNT2 TRP1 LEU2 HIS3                      | [1]        |
| Y01     | Lab001 $\Delta$ tpi; pCPOT1                                                  | This study |
| Y02     | Lab001 $\Delta$ tpi; pCPOT2                                                  | This study |
| Y03     | Lab001 $\Delta$ tpi; pCPOT3                                                  | This study |
| Y04     | Lab001 $\Delta$ tpi; pCPOT4                                                  | This study |
| Y05     | Lab001 $\Delta$ tpi; X1-1::pTDH3-BUD1-tCYC1; pCPOT3                          | This study |
| Y06     | Lab001 $\Delta$ tpi; X1-1::pTDH3-BUD1-tCYC1; pCPOT4                          | This study |
| Y07     | Lab001 $\Delta$ tpi; XI1-5::pTDH3-BUD10-tCYC1; pCPOT3                        | This study |
| Y08     | Lab001 $\Delta$ tpi; XI1-5::pTDH3-BUD10-tCYC1; pCPOT4                        | This study |
| Y09     | Lab001 $\Delta$ tpi; X1-1::pTDH3-BUD1-tCYC1; XII-2::pTDH3-BUD7-tCYC1 pCPOT3  | This study |
| Y10     | Lab001 $\Delta$ tpi; X1-1::pTDH3-BUD1-tCYC1; XII-2::pTDH3-CDC42-tCYC1 pCPOT3 | This study |
| Y11     | Lab001 $\Delta$ tpi; X1-1::pTDH3-BUD1-tCYC1; XII-2::pTDH3-BUD1-tCYC1 pCPOT4  | This study |
| Y12     | Lab001 $\Delta$ tpi; X1-1::pTDH3-BUD1-tCYC1; XII-2::pTDH3-CDC42-tCYC1 pCPOT4 | This study |
| Y13     | Lab001 $\Delta$ tpi; X1-1::pTDH3-BUD1-tCYC1; XII-2::pTDH3-BUD10-tCYC1 pCPOT4 | This study |
| BUD1S   | Y03;pBUD1                                                                    | This study |
| BUD2S   | Y03;pBUD2                                                                    | This study |
| BUD5S   | Y03;pBUD5                                                                    | This study |
| BUD7S   | Y03;pBUD7                                                                    | This study |
| BUD8S   | Y03;pBUD8                                                                    | This study |
| BUD9S   | Y03;pBUD9                                                                    | This study |
| CDC4S   | Y03;pCDC42                                                                   | This study |

|         |            |            |
|---------|------------|------------|
| RAX1S   | Y03;pRAX1  | This study |
| RAX2S   | Y03;pRAX2  | This study |
| AXL1S   | Y03;pAXL1  | This study |
| BUD3S   | Y03;pBUD3  | This study |
| BUD4S   | Y03;pBUD4  | This study |
| BUD10S  | Y03;pBUD10 | This study |
| BUD1    | Y04;pBUD1  | This study |
| BUD2    | Y04;pBUD2  | This study |
| BUD5    | Y04;pBUD5  | This study |
| BUD7    | Y04;pBUD7  | This study |
| BUD8    | Y04;pBUD8  | This study |
| BUD9    | Y04;pBUD9  | This study |
| CDC42   | Y04;pCDC42 | This study |
| RAX1    | Y04;pRAX1  | This study |
| RAX2    | Y04;pRAX2  | This study |
| AXL1    | Y04;pAXL1  | This study |
| BUD3    | Y04;pBUD3  | This study |
| BUD4    | Y04;pBUD4  | This study |
| BUD10   | Y04;pBUD10 | This study |
| BUD1SC  | Y05;pBUD1  | This study |
| BUD2SC  | Y05;pBUD2  | This study |
| BUD5SC  | Y05;pBUD5  | This study |
| BUD7SC  | Y05;pBUD7  | This study |
| BUD8SC  | Y05;pBUD8  | This study |
| BUD9SC  | Y05;pBUD9  | This study |
| CDC42SC | Y05;pCDC42 | This study |
| RAX1SC  | Y05;pRAX1  | This study |
| RAX2SC  | Y05;pRAX2  | This study |
| AXL1SC  | Y05;pAXL1  | This study |
| BUD3SC  | Y05;pBUD3  | This study |
| BUD4SC  | Y05;pBUD4  | This study |
| BUD10SC | Y05;pBUD10 | This study |
| BUD1C   | Y06;pBUD1  | This study |
| BUD2C   | Y06;pBUD2  | This study |
| BUD5C   | Y06;pBUD5  | This study |
| BUD7C   | Y06;pBUD7  | This study |
| BUD8C   | Y06;pBUD8  | This study |
| BUD9C   | Y06;pBUD9  | This study |
| CDC42C  | Y06;pCDC42 | This study |
| RAX1C   | Y06;pRAX1  | This study |
| RAX2C   | Y06;pRAX2  | This study |
| AXL1C   | Y06;pAXL1  | This study |
| BUD3C   | Y06;pBUD3  | This study |

|            |                   |            |
|------------|-------------------|------------|
| BUD4C      | Y06;pBUD4         | This study |
| BUD10C     | Y06;pBUD10        | This study |
| BGL1       | Y11; pJBGL1       | This study |
| BGL1-SED1p | Y10; pJBGL-L-SED1 | This study |
| BGL1-AGA1p | Y10; pJBGL-L-AGA1 | This study |
| BGL1-DAN4p | Y10; pJBGL-L-DAN4 | This study |

**Table S2.** Plasmids used in this study

| Strains | Relevant characteristics/ genotype                                              | Reference  |
|---------|---------------------------------------------------------------------------------|------------|
| pCPOT   | Yeast 2 $\mu$ plasmid with POT1 gene from <i>S. pombe</i> as a selection marker | [2]        |
| pCPOT1  | pCPOT with TPI1 promoter, TPI1 terminator and INU1-a-amylase-V5-linker-SED1     | This study |
| pCPOT2  | pCPOT with TPI1 promoter, TPI1 terminator and INU1-a-amylase-V5                 | This study |
| pCPOT3  | pCPOT with TDH3 promoter, TPI1 terminator and INU1-a-amylase-V5-linker-SED1     | This study |
| pCPOT4  | pCPOT with TDH3 promoter, TPI1 terminator and INU1-a-amylase-V5                 | This study |
| pPOT2   | Yeast centromeric plasmid with URA3 marker                                      | Laboratory |
| pTDH3   | pPOT2 with TDH3 promoter, ADH1 terminator and eGFP                              | [3]        |
| pTPI1   | pPOT2 with TPI1 promoter, ADH1 terminator and eGFP                              | [3]        |
| pBUD1   | pPOT2 with TDH3 promoter, CYC1 terminator and BUD1 gene                         | This study |
| pBUD2   | pPOT2 with TDH3 promoter, CYC1 terminator and BUD2 gene                         | This study |
| pBUD5   | pPOT2 with TDH3 promoter, CYC1 terminator and BUD5 gene                         | This study |
| pBUD7   | pPOT2 with TDH3 promoter, CYC1 terminator and BUD7 gene                         | This study |
| pBUD8   | pPOT2 with TDH3 promoter, CYC1 terminator and BUD8 gene                         | This study |
| pBUD9   | pPOT2 with TDH3 promoter, CYC1 terminator and BUD9 gene                         | This study |
| pCDC42  | pPOT2 with TDH3 promoter, CYC1 terminator and CDC42 gene                        | This study |
| pRAX1   | pPOT2 with TDH3 promoter, CYC1 terminator and RAX1 gene                         | This study |
| pRAX2   | pPOT2 with TDH3 promoter, CYC1 terminator and RAX2 gene                         | This study |

|              |                                                                                                                                                     |            |
|--------------|-----------------------------------------------------------------------------------------------------------------------------------------------------|------------|
| pAXL1        | pPOT2 with TDH3 promoter, CYC1 terminator and AXL1 gene                                                                                             | This study |
| pBUD3        | pPOT2 with TDH3 promoter, CYC1 terminator and BUD3 gene                                                                                             | This study |
| pBUD4        | pPOT2 with TDH3 promoter, CYC1 terminator and BUD4 gene                                                                                             | This study |
| pBUD10       | pPOT2 with TDH3 promoter, CYC1 terminator and BUD10 gene                                                                                            | This study |
| pJFE3        | Yeast 2 $\mu$ plasmid with URA3 marker                                                                                                              | [2]        |
| pJBGL1       | pJFE3 with TEF1 promoter, PGK1 terminator and BGL1-linker-V5 tag                                                                                    | Laboratory |
| pJBGL-L-AGA1 | pJFE3 with TEF1 promoter, PGK1 terminator and BGL1-linker-V5-AGA1                                                                                   | [4]        |
| pJBGL-L-DAN4 | pJFE3 with TEF1 promoter, PGK1 terminator and BGL1-linker-V5-DAN4                                                                                   | [4]        |
| pJBGL-L-SED1 | pJFE3 with TEF1 promoter, PGK1 terminator and BGL1-linker-V5-SED1                                                                                   | [4]        |
| pQC030       | pMEL10 with gRNA of XI-1                                                                                                                            | Laboratory |
| pQC007       | pMEL10 with gRNA of XII-2                                                                                                                           | Laboratory |
| pTH-amys     | Yeast centromeric plasmid with HIS marker, PGK1 promoter, CYC1 terminator and $\alpha$ -amylase gene from <i>A. oryzae</i> with SUC2 signal peptide | [5]        |
| pQCTPI1      | pMEL10 with gRNA of TPI1                                                                                                                            | This study |

**Table S3.** Primers used in this study

| Primer           | Sequence 5'→3'                                                   |
|------------------|------------------------------------------------------------------|
| backbone-pPOT2-f | TTTGGGACGCTCGAAGGCTTTAATTTGCGGCCGGTACCCCCT<br>CAGGCAGAGACCCAAGA  |
| backbone-pPOT2-r | GTATTCTTTGAAATGGCAGTATTGATAATGATAAACTCGAA<br>GCCAGGTAGAGACCGAGT  |
| TDH3p-f          | TCGAGTTTATCATTATCAATACTGCCATTTC                                  |
| TDH3p-r          | CATTTTGTTTGTATGTGTGTTTATTCGAAACTAA                               |
| CYC1t-f          | GATACCGTCGACCTCGAGTC                                             |
| CYC1t-r          | GGGTACCGGCCGCAAATTAAAG                                           |
| Bud1-f           | TCGAATAAACACACATAAAACAAACAAAATGAGAGACTATA<br>AATTAGTAGTATTGGGTGC |
| Bud1-r           | ATAACTAATTACATGACTCGAGGTCGACGGTATCCTATAGA<br>ATAGTGCAAGTGGAAGCG  |
| BUD2-f           | GAACTTAGTTTCGAATAAACACACATAAAACAAACAAAATG<br>AGCTCCAACAATGAACCGG |
| BUD2-r           | AATTACATGACTCGAGGTCGACGGTATCTTAAGATCCCCCT<br>GTTTCTTTTTTCTTTTTG  |

|         |                                                                   |
|---------|-------------------------------------------------------------------|
| BUD5-f  | GAATAAACACACATAAAACAAACAAAATGAGCCCGAAAAA<br>CAAATATGTATATATCTGTG  |
| BUD5-r  | CATAACTAATTACATGACTCGAGGTCGACGGTATCTTAGGT<br>AAGCCTTGGAACCTTAGC   |
| BUD7-f  | AGTTTCGAATAAACACACATAAAACAAACAAAATGATTACG<br>CAGAATTCTATACCAGAGG  |
| BUD7-r  | CATAACTAATTACATGACTCGAGGTCGACGGTATCTTATGC<br>ATCGTAGCATCCAATGGT   |
| BUD8-f  | TCGAATAAACACACATAAAACAAACAAAATGATACAATCAG<br>ACGAAGATAATTTGGACTC  |
| BUD8-r  | CTAATTACATGACTCGAGGTCGACGGTATCTTATTCACGTGT<br>TATACCCACACCAAATC   |
| BUD9-f  | TCGAATAAACACACATAAAACAAACAAAATGACGAAAATAA<br>CCAGAGATGTTTCGATAAC  |
| BUD9-r  | TAATTACATGACTCGAGGTCGACGGTATCTTACTCTCTTATT<br>ATTCCCACACCAAATCC   |
| CDC42-f | CAAGAACTTAGTTTCGAATAAACACACATAAAACAAACAAA<br>ATGCAAACGCTAAAGTGTG  |
| CDC42-r | ACTAATTACATGACTCGAGGTCGACGGTATCCTACAAAATT<br>GCACATTTTTTACTTTTC   |
| RAX1-f  | TTAGTTTCGAATAAACACACATAAAACAAACAAAATGAAGG<br>AAGAGCTCAGCAAAGTGAG  |
| RAX1-r  | GTGACATAACTAATTACATGACTCGAGGTCGACGGTATCTC<br>ATACACGACGGCCGGGAA   |
| RAX2-f  | CTTAGTTTCGAATAAACACACATAAAACAAACAAAATGTTTG<br>TTCATCGTCTCTGGACAC  |
| RAX2-r  | TAATTACATGACTCGAGGTCGACGGTATCTTAGACAAACTT<br>CATAAGTTTTTCGGGTGG   |
| AXL1-f  | TTCGAATAAACACACATAAAACAAACAAAATGTCCTTGAGA<br>GAAGTAACTAATTATGAAG  |
| AXL1-r  | GCGTGACATAACTAATTACATGACTCGAGGTCGACGGTATC<br>TCAAAATGCGGCCTTGCG   |
| BUD3-f  | GAACTTAGTTTCGAATAAACACACATAAAACAAACAAAATG<br>GAGAAAGACCTGTCGTCTC  |
| BUD3-r  | CTAATTACATGACTCGAGGTCGACGGTATCTCAATAAAATTT<br>CAGTTTCTCTGGGCCAC   |
| BUD4-f  | AAGAACTTAGTTTCGAATAAACACACATAAAACAAACAAAA<br>TGCACGACGCAGAGAGTAC  |
| BUD4-r  | ATTACATGACTCGAGGTCGACGGTATCCTAATTAAAATCTTG<br>CTTCAAATTATGACCGG   |
| BUD10-f | AGTTTCGAATAAACACACATAAAACAAACAAAATGACACAG<br>CTTCAGATTTTCATTATTGC |
| BUD10-r | TGACATAACTAATTACATGACTCGAGGTCGACGGTATCTCA<br>CAGCATTTCTGGGATGCG   |

|                  |                                                                  |
|------------------|------------------------------------------------------------------|
| MYO2-f           | CTTAGTTTCGAATAAACACACATAAAACAAACAAAATGTCTT<br>TTGAAGTGGGTACACGAT |
| MYO2-r           | TGACATAACTAATTACATGACTCGAGGTCGACGGTATCTTA<br>GTGGCCGTCTTGAACGAC  |
| XI-1 up fw       | ATTTGTGTGAAGGAATAGTGACG                                          |
| XI-1 up rv       | GTATTCTTTGAAATGGCAGTATTGATAATGATAAACTCGAC<br>AATGGGCTTGGTATTCCG  |
| XI-1 down fw     | TTTGGGACGCTCGAAGGCTTTAATTTGCGGCCGGTACCCCTT<br>CTTGGCATTGGCAAATC  |
| XI-1 down rv     | AAGAGCCGAGTCCCCATCAG                                             |
| XII-2 up fw      | CGGCATGCAAACATCTACAC                                             |
| XII-2 up rv      | TATTCTTTGAAATGGCAGTATTGATAATGATAAACTCGACAT<br>AACGCGTTACACGGAAG  |
| XII-2 down fw    | TTGGGACGCTCGAAGGCTTTAATTTGCGGCCGGTACCCCTAC<br>TATCGGCGACTCTCTCG  |
| XII-2 down rv    | GAGCGAACGTAAGAGAGGTTAATG                                         |
| XI-1 det fw      | CTTAATGGGTAGTGCTTGACACG                                          |
| XI-1 det rv      | GAAGACCCATGGTTCCAAGGA                                            |
| XII-2 det fw     | CGAAGAAGGCCTGCAATTC                                              |
| XII-2 det rv     | GGCCCTGATAAGGTTGTTG                                              |
| CPOT-backobone-r | GGTACCTTTTAGTTTATGTATGTG                                         |
| CPOT-backobone-f | TAACTCGAGTCTAGAAACTAAG                                           |
| amy-f            | CACATACATAAACTAAAAGGTACCATGAAGTTTCGCATACTC<br>CCTC               |
| amy-sed-r        | CTTAGTTTCTAGACTCGAGTTATAAGAATAACATAGCAACA<br>CC                  |
| amy-r            | CTTAGTTTCTAGACTCGAGTTAAGTAGAATCTAAACCCAAC<br>AAAGG               |
| CPOT-r2          | GGCCGGCCGGATCCATGCCAACGGTTG                                      |
| CPOT-f2          | GGTACCATGAAGTTCGCATACTCCC                                        |
| amy-pTDH3-f      | TGGCATGGATCCGGCCGGCCTCATTATCAATACTGCCATTC                        |
| amy-pTDH3-r      | TATGCGAACTTCATGGTACCTTTGTTTGTGTTATGTGTGTTTAT<br>TCG              |

## References

1. Zheng, T.; Zhang, M.; Wu, L.; Guo, S.; Liu, X.; Zhao, J.; Xue, W.; Li, J.; Liu, C.; Li, X.; et al. Upcycling CO<sub>2</sub> into energy-rich long-chain compounds via electrochemical and metabolic engineering. *Nature Catalysis* **2022**, *5*, 388-396, doi:10.1038/s41929-022-00775-6.
2. Tang, H.; Hou, J.; Shen, Y.; Xu, L.; Yang, H.; Fang, X.; Bao, X. High  $\beta$ -glucosidase secretion in *Saccharomyces cerevisiae* improves the efficiency of cellulase hydrolysis and ethanol production in simultaneous saccharification and fermentation. *J Microbiol Biotechnol* **2013**, *23*, 1577-1585, doi:10.4014/jmb.1305.05011.



3. Deng, J.; Wu, Y.; Zheng, Z.; Chen, N.; Luo, X.; Tang, H.; Keasling, J.D. A synthetic promoter system for well-controlled protein expression with different carbon sources in *Saccharomyces cerevisiae*. *Microb Cell Fact* **2021**, *20*, 202, doi:10.1186/s12934-021-01691-3.
4. Yang, X.; Tang, H.; Song, M.; Shen, Y.; Hou, J.; Bao, X. Development of novel surface display platforms for anchoring heterologous proteins in *Saccharomyces cerevisiae*. *Microb Cell Fact* **2019**, *18*, 85, doi:10.1186/s12934-019-1133-x.
5. Tang, H.; Bao, X.; Shen, Y.; Song, M.; Wang, S.; Wang, C.; Hou, J. Engineering protein folding and translocation improves heterologous protein secretion in *Saccharomyces cerevisiae*. *Biotechnol Bioeng* **2015**, *112*, 1872-1882, doi:10.1002/bit.25596.
